# Supplementary material for: Hierarchical porous nitrogen-rich carbon monoliths via ice-templating: high capacity and high-rate performance as lithium-ion battery anode materials
Source: Royal Society of Chemistry journal article supplement (doi:10.1039/c4ta02839b), 2014-01-01
Supplement: c4ta02839b1.pdf [file c4ta02839b1.pdf]

## Supporting Information

### **Hierarchical porous nitrogen-rich carbon monoliths *via* ice-templating: high capacity and high-rate performance as lithium-ion battery anode materials**

**Aled D. Roberts<sup>a,b</sup>, Suxi Wang<sup>b</sup>, Xu Li<sup>b\*</sup>, and Haifei Zhang<sup>a\*</sup>**

<sup>a</sup> Department of Chemistry, University of Liverpool, Oxford Street, Liverpool, L69 7ZD, UK. Email: zhanghf@liv.ac.uk

<sup>b</sup> Institute of Materials Research and Engineering, A\*STAR, Singapore 117602. Email: x-li@imre.a-star.edu.sg

**Table S1.** Characterization data for the PAN50 and CPAN50 samples by Hg intrusion porosimetry

|               | <b>Total Intrusion<br/>Volume (cm<sup>3</sup>/g)</b> | <b>Total Pore<br/>Area (m<sup>2</sup>/g)</b> | <b>Average Pore Diameter<br/>(4V/A) (μm)</b> |
|---------------|------------------------------------------------------|----------------------------------------------|----------------------------------------------|
| <b>PAN50</b>  | 8.01                                                 | 3.56                                         | 9.0                                          |
| <b>CPAN50</b> | 1.13                                                 | 0.82                                         | 5.6                                          |

**Table S2.** Summary of the conductivity and elemental content of the carbonized PAN monoliths

| <b>PAN<br/>concentration<br/>(mg cm<sup>-3</sup>)</b> | <b>Conductivity (S cm<sup>-1</sup>)</b> | <b>C (%)</b> | <b>H (%)</b> | <b>N (%)</b> | <b>O (%)<br/>(inferred)</b> |
|-------------------------------------------------------|-----------------------------------------|--------------|--------------|--------------|-----------------------------|
| 25                                                    | 1.53×10 <sup>-3</sup>                   | 72.0         | 1.04         | 16.4         | 10.56                       |
| 50                                                    | 2.03×10 <sup>-2</sup>                   | 74.9         | 1.31         | 15.7         | 8.09                        |
| 100                                                   | 3.06×10 <sup>-2</sup>                   | 70.9         | 1.05         | 16.7         | 11.35                       |
| 150                                                   | 4.29×10 <sup>-2</sup>                   | 73.2         | 0.84         | 17.3         | 8.66                        |
| 200                                                   | 5.73×10 <sup>-2</sup>                   | 75.9         | 0.77         | 16.0         | 8.03                        |

**Table S3.** Comparison of reversible ( $C_{rev}$ ) and irreversible ( $C_{irr}$ ) capacity values of a number of templated porous carbons described in the literature.

| Template                         | Carbon precursor           | $C_{irr}$<br>(mAh g <sup>-1</sup> ) | $C_{rev}$<br>(mAh g <sup>-1</sup> ) | $C_{rev}$ after N cycles<br>(mAh g <sup>-1</sup> ) | N<br>cycles | Ref.         |
|----------------------------------|----------------------------|-------------------------------------|-------------------------------------|----------------------------------------------------|-------------|--------------|
| Silica monolith                  | Mesophase pitch            | 680                                 | 900                                 | 500                                                | 40          | [1]          |
| Silica SBA-15                    | Sucrose                    | 2000                                | 1100                                | 800                                                | 20          | [2]          |
| Silica particles &<br>PS spheres | Furfurylalcohol            | 671                                 | 903                                 | 799                                                | 80          | [3]          |
| SBA-15                           | Furfurylalcohol            | N/A                                 | 714                                 | 583                                                | 80          | [3]          |
| Inverse silica opal              | Benzene (CVD)              | N/A                                 | 326                                 | 320                                                | 60          | [4]          |
| PMMA                             | Recorcinol<br>Formaldehyde | 400                                 | 300                                 | 150                                                | 150         | [5]          |
| Ice crystals                     | Polyacrylonitrile          | 450                                 | 702                                 | 570                                                | 50          | This<br>work |

**Table S4.** Comparison of some of the best high-rate performance carbon-based anode materials described in the literature

| Description                               | $C_{rev}$ at current density X<br>(mAh g <sup>-1</sup> ) | Current density X<br>(A g <sup>-1</sup> ) | Ref.      |
|-------------------------------------------|----------------------------------------------------------|-------------------------------------------|-----------|
| Carbon templated by silica and PS spheres | 750                                                      | 1                                         | [3]       |
| Nitrogen-doped pristine graphene          | 250                                                      | 10                                        | [6]       |
| Boron-doped pristine graphene             | 300                                                      | 10                                        | [6]       |
| N-rich porous carbon derived from protein | 210                                                      | 4                                         | [7]       |
| N-doped activated carbon nanofiber web    | 320                                                      | 10                                        | [8]       |
| N-doped carbon spheres (<100nm)           | 200                                                      | 3                                         | [9]       |
| CPAN50                                    | 320                                                      | 1                                         | This work |
| CPAN50 - Melamine & graphene doped        | 300                                                      | 10                                        | This work |

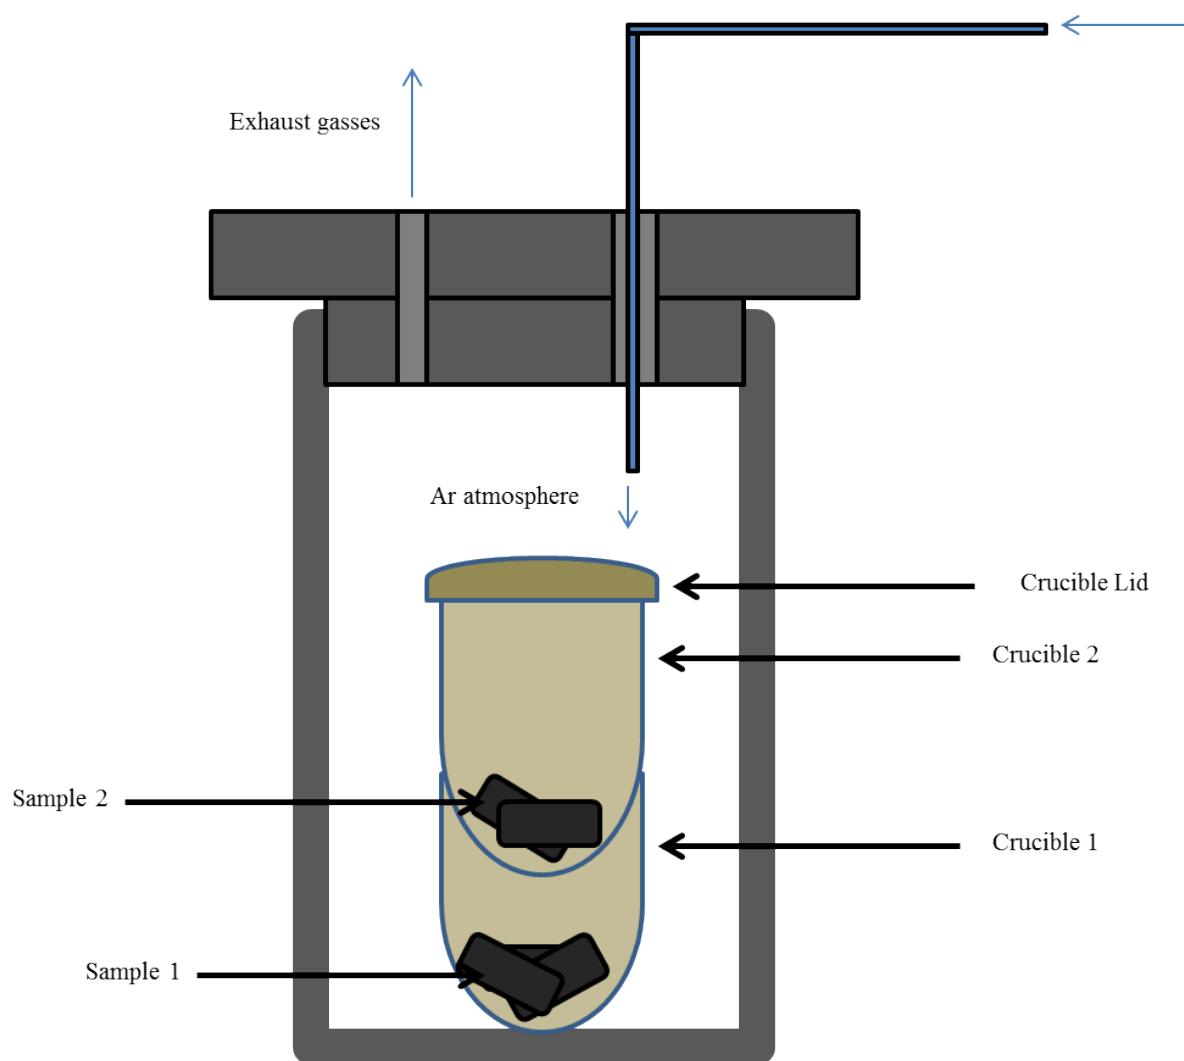

Figure S1. Schematic representation of the 'home-made' pyrolysis setup.

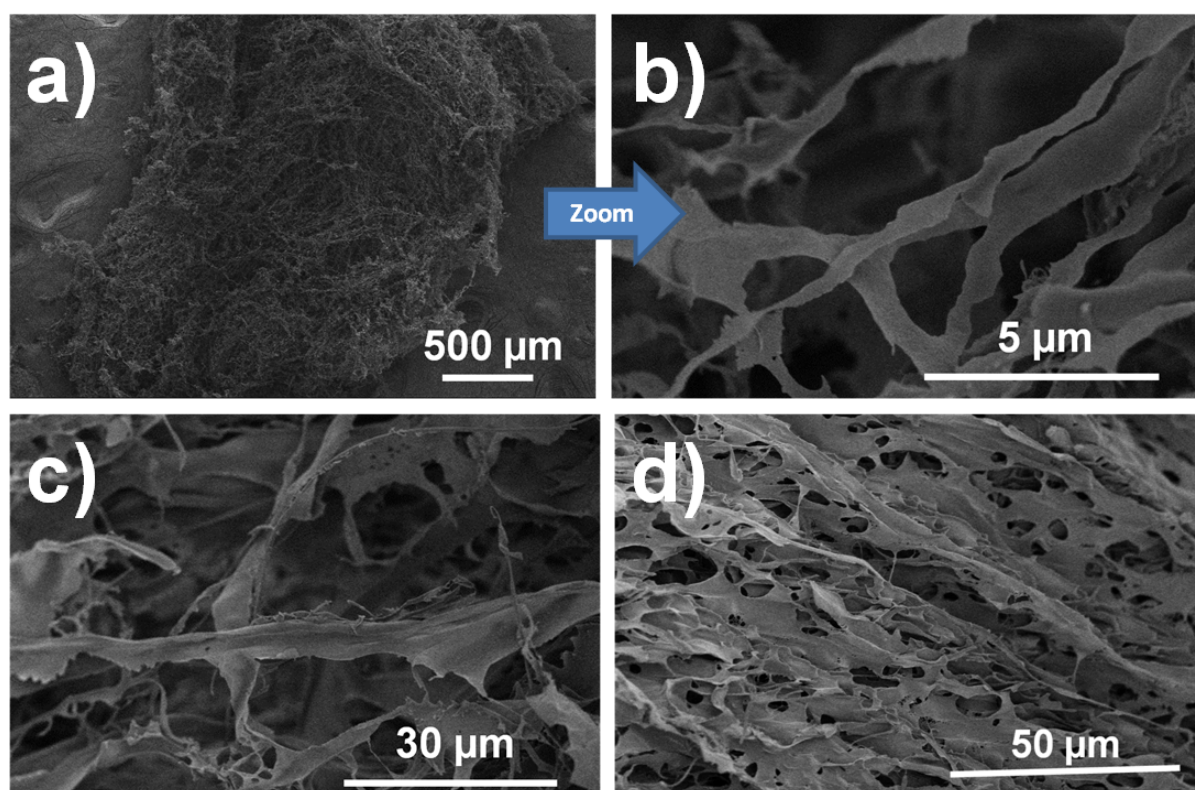

Figure S2. SEM images of PAN monoliths prepared from the relatively low concentrations of a) & b) 1 mg cm<sup>-3</sup>, c) 2.5 mg cm<sup>-3</sup> and d) 10 mg cm<sup>-3</sup>

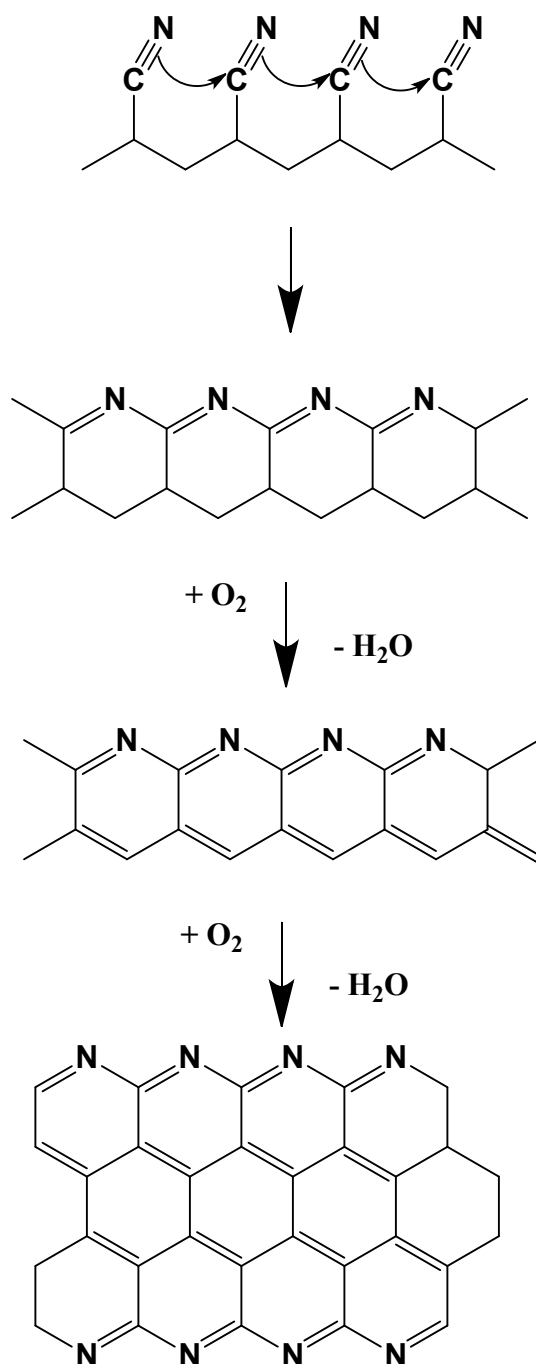

Figure S3. Schematic representation of the oxidative annealing (crosslinking) process of PAN.

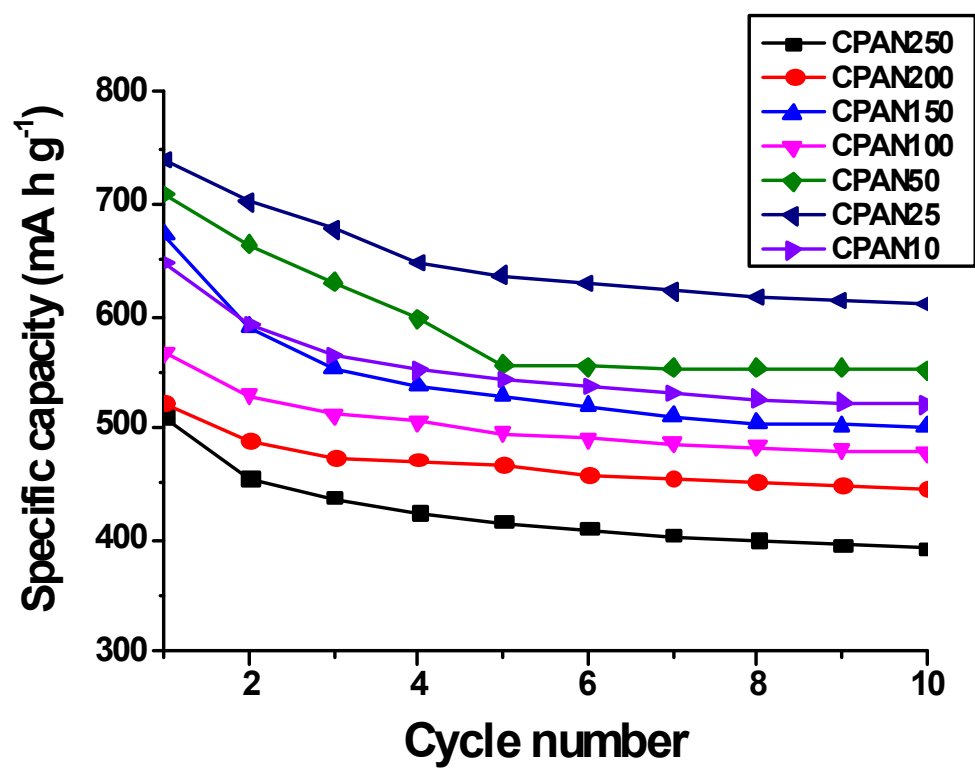

Figure S4. Comparison of the specific capacity values of the porous carbons prepared at different initial PAN/DMSO concentrations, over 10 charge/discharge cycles.

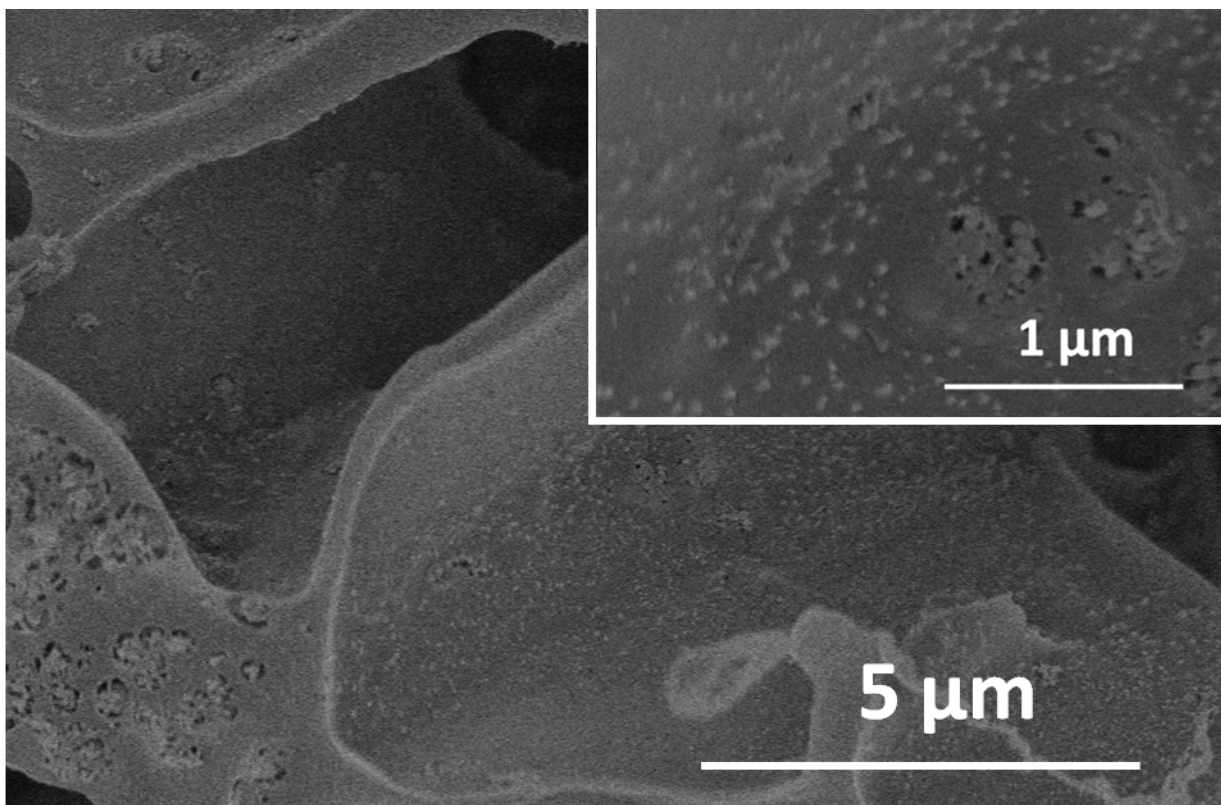

Figure S5. SEM images of the silicon nanoparticle-carbon composite prepared by ice-templating started from a suspension of silicon nanoparticles in a PAN in DMSO solution. The PAN concentration was  $50 \text{ mg cm}^{-3}$  and the ratio of silicon nanoparticles to PAN was 1:1.



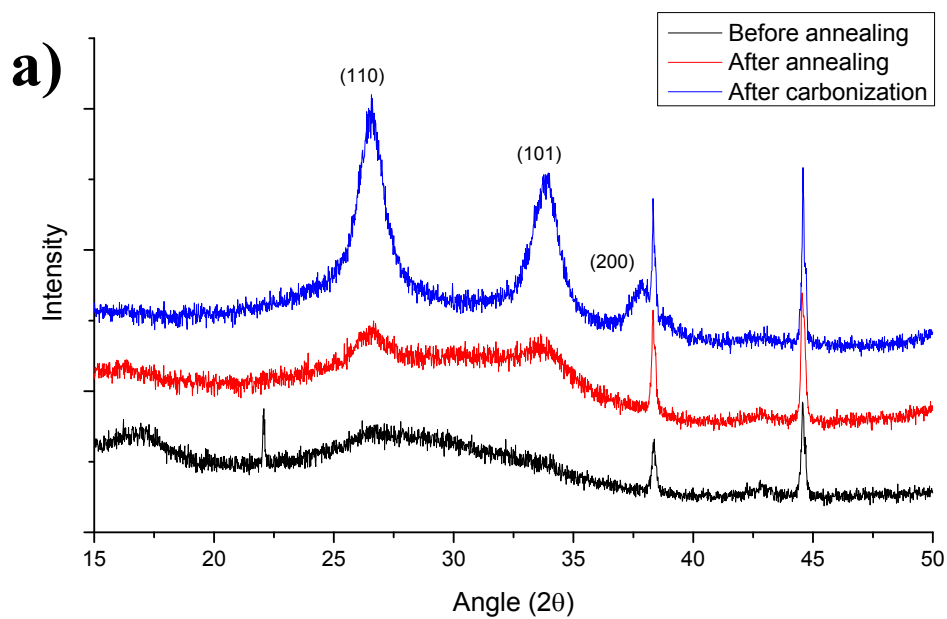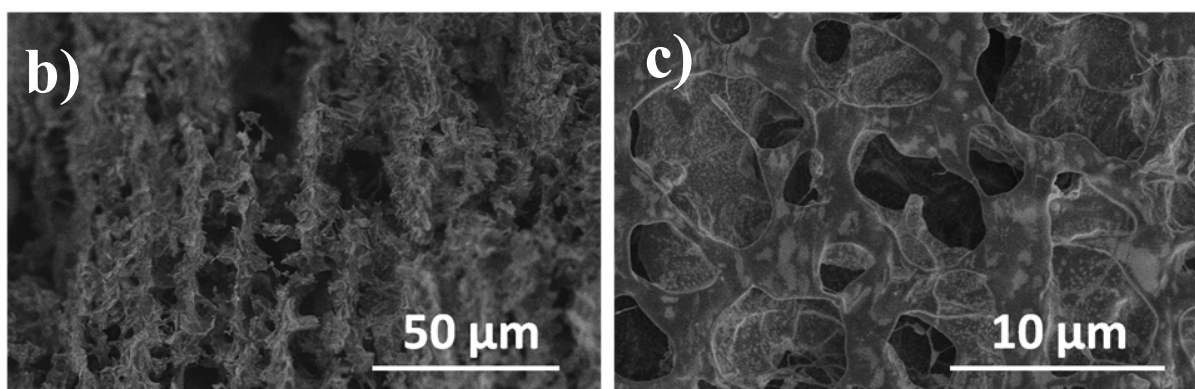

Figure S6. a) XRD patterns of a PAN-Sn(OAc)<sub>2</sub> composite before and after carbonization at 550 °C. The appearance of the associated (110), (101) and (200) diffraction peaks indicates the conversion of Sn(OAc)<sub>2</sub> to SnO<sub>2</sub>. The concentration of PAN was 50 mg cm<sup>-3</sup> and the ratio of PAN to Sn(OAc)<sub>2</sub> was 1:1. b) SEM images of the carbon-SnO<sub>2</sub> composites.

## References

1. Y. S. Hu, P. Adelhelm, B. M. Smarsly, S. Hore, M. Antonietti and J. Maier, *Advanced Functional Materials*, 2007, **17**, 1873-1878.
2. H. Zhou, S. Zhu, M. Hibino, I. Honma and M. Ichihara, *Advanced Materials*, 2003, **15**, 2107-2111.
3. B. Fang, M.-S. Kim, J. H. Kim, S. Lim and J.-S. Yu, *Journal of Materials Chemistry*, 2010, **20**, 10253-10259.
4. F. Su, X. S. Zhao, Y. Wang, J. Zeng, Z. Zhou and J. Y. Lee, *The Journal of Physical Chemistry B*, 2005, **109**, 20200-20206.
5. K. T. Lee, J. C. Lytle, N. S. Ergang, S. M. Oh and A. Stein, *Advanced Functional Materials*, 2005, **15**, 547-556.
6. Z.-S. Wu, W. Ren, L. Xu, F. Li and H.-M. Cheng, *ACS Nano*, 2011, **5**, 5463-5471.
7. Z. Li, Z. Xu, X. Tan, H. Wang, C. M. B. Holt, T. Stephenson, B. C. Olsen and D. Mitlin, *Energy & Environmental Science*, 2013, **6**, 871-878.
8. L. Qie, W.-M. Chen, Z.-H. Wang, Q.-G. Shao, X. Li, L.-X. Yuan, X.-L. Hu, W.-X. Zhang and Y.-H. Huang, *Advanced Materials*, 2012, **24**, 2047-2050.
9. Y. Wang, F. Su, C. D. Wood, J. Y. Lee and X. S. Zhao, *Industrial & Engineering Chemistry Research*, 2008, **47**, 2294-2300.
